# Supplementary material for: Reconnaissance of reactivity of an Ag(ii)SO4 one-electron oxidizer towards naphthalene derivatives
Source: Royal Society of Chemistry journal article supplement (doi:10.1039/c7nj02299a), 2017-01-01

## SUPPLEMENTARY INFORMATION

### Reconnaissance of reactivity of Ag(II)SO<sub>4</sub> one-electron oxidizer towards naphthalene derivatives

Adam K. Budniak,<sup>[a,b]</sup> Michał Masny,<sup>[c]</sup> Kristina Prezelj,<sup>[a]</sup> Mikołaj Grzeszkiewicz,<sup>[d]</sup> Jakub Gawraczyński,<sup>[a,b]</sup> Łukasz Dobrzycki,<sup>[e]</sup> Michał K. Cyrański,<sup>[e]</sup> Wiktor Koźmiński,<sup>[b]</sup> Zoran Mazej,<sup>[f]</sup> Karol J. Fijałkowski,<sup>[a]</sup> Wojciech Grochala,<sup>\*[a]</sup> and Piotr J. Leszczyński,<sup>\*[a]</sup>

<sup>[a]</sup> Center of New Technologies, University of Warsaw, Żwirki i Wigury 93, 02089 Warsaw Poland

<sup>[b]</sup> Faculty of Chemistry, University of Warsaw, Pasteur 1, 02093 Warsaw Poland

<sup>[c]</sup> Faculty of Physics, University of Warsaw, Pasteur 5, 02093 Warsaw, Poland

<sup>[d]</sup> Department of Materials Engineering, Warsaw University of Technology, Wołoska 141, 02507 Warsaw, Poland

<sup>[e]</sup> The Czocharski Laboratory of Advanced Crystal Engineering, Faculty of Chemistry, University of Warsaw, Żwirki i Wigury 101, 02089 Warsaw, Poland

<sup>[f]</sup> Department of Inorganic Chemistry and Technology, Jožef Stefan Institute, Jamova cesta 39, 1000 Ljubljana Slovenia

#### Contents

S1. Experimental methodology.

S2. Syntheses.

S3. Results table.

S4. Description of products obtained.

S5. A typical powder XRD of the solid post-reaction residue.

S6. NMR Spectra for 5,5'-bis(trifluoromethyl)-1,1'-binaphthyl

### ***S1. Experimental methodology.***

**XRD: Powder:** Panalytical X'Pert PRO MPD, Bragg-Brentano configuration, Co lamp  $\lambda_1 = 1.78901$ ,  $\lambda_2 = 1.79290$  Å. **Monocrystalline:** Bruker D8 Venture with TRIUMPH detector, Mo lamp and Cu lamp micro focus, low temperature measurements  $T = 100$  K.

**NMR:** Bruker Avance III 500 MHz

**GC/MS:** Agilent 7890A&5975 spectrometer (EI ionization) with HP-5MS column (300 Celsius), Mass spectra were recorded in the range of 10-800 amu. All GC/MS measurements reported in SI were performed commercially in the Institute of Organic Chemistry (Polish Academy of Sciences). For ESI/TOF technique the Agilent 6890N was used.

**IR:** Bruker Vertex80V FTIR spectrometer in either MIR or FIR configuration: **MIR:** DLaTGS detector, KBr beamsplitter, Globar source. Samples prepared using KBr pellet method. Each spectrum was averaged from at least 16 scans. Spectra were recorded in 4000-400 cm<sup>-1</sup> range. **FIR:** DTGS detectors, Mylar 6µm foil beamsplitter, Globar source. Samples consisted of powder smeared on HDPE windows. Each spectrum was averaged from at least 64 scans. Spectra were recorded in 680-40 cm<sup>-1</sup> range. Each individual spectrum had background removed. FIR and MIR spectra of each compound were scaled and merged together.

**Preparative TLC:** Analtech silica gel GF 20 x 20 cm 1500 microns preparative TLC plate.

## ***S2. Syntheses.***

(1+11) 400 mg of Ag(II)SO<sub>4</sub> (2 mmol) was added to the solution of 128.0 mg naphthalene (1 mmol) in 10 ml of 1,1,1,3,3,3-hexafluoro-2-propanol. Reaction mixture was stirred 72 H at room temperature in inert atmosphere (glovebox). Post-reaction mixture was extracted using hexane. After evaporation in vacuum crude product was dissolved in CHCl<sub>3</sub> and purified using Analtech silica gel GF 20 x 20 cm 1500 microns preparative TLC plate. (1) White solid. Yield after separation on preparative TLC plate using hexane as the eluent ( $R_F = 0.48$ ): 6.5 % of Theory. Formation of small amounts of (11) (unknown isomer) was confirmed using GC/MS technique.

(1) has also been obtained using Ag(II)SO<sub>4</sub> (40 mg, 0.2 mmol) and naphthalene (12.8 mg, 0.1 mmol) reaction in 1 ml of cyclohexane. Reaction time: 72 H. Formation of small amounts of (11) (unknown isomer) has been confirmed using GC/MS technique.

(2+12) 400 mg of Ag(II)SO<sub>4</sub> (2 mmol) was added to the solution of 146.0 mg 1-fluoronaphthalene (1 mmol) in 10 ml of 1,1,1,3,3,3-hexafluoro-2-propanol. Reaction mixture was stirred 72 H at room temperature in inert atmosphere (glovebox). Post-reaction mixture was extracted using hexane. After evaporation in vacuum crude product was dissolved in CHCl<sub>3</sub> and purified using Analtech silica gel GF 20 x 20 cm 1500 microns preparative TLC plate. (2) White solid. Yield after separation on preparative TLC plate using hexane as the eluent ( $R_F = 0.45$ ): 3.8 % of Theory. Formation of small amounts of (12) (unknown isomer) was confirmed using GC/MS technique.

(3) 400 mg of Ag(II)SO<sub>4</sub> (2 mmol) was added to the solution of 163.5 mg 1-chloronaphthalene (1 mmol) in 10 ml of 1,1,1,3,3,3-hexafluoro-2-propanol. Reaction mixture was stirred 72 H at room temperature in inert atmosphere (glovebox). Post-reaction mixture was extracted using hexane. After evaporation in vacuum crude product was dissolved in CHCl<sub>3</sub> and purified using Analtech silica gel GF 20 x 20 cm 1500 microns preparative TLC plate. White solid. Yield after separation on preparative TLC plate using hexane as the eluent ( $R_F = 0.46$ ): 7.0 % of Theory.

(3) 100 mg of Ag(II)SO<sub>4</sub> (0.5 mmol) was added to the solution of 163.5 mg 1-chloronaphthalene (1 mmol) in 10 ml of 1,1,1,3,3,3-hexafluoro-2-propanol. Reaction mixture was stirred 72 H at room temperature in inert atmosphere (glovebox). Post-reaction mixture was extracted using hexane. After evaporation in vacuum crude product was dissolved in CHCl<sub>3</sub> and purified using Analtech silica gel GF 20 x 20 cm 1500 microns preparative TLC plate. White solid. Yield after separation on preparative TLC plate using hexane as the eluent ( $R_F = 0.46$ ): 1.0 % of Theory.

(3) 238.5 mg of Ag(II)SO<sub>4</sub> (1.2 mmol) was added to the solution of 163.5 mg 1-chloronaphthalene (1 mmol) in 5 ml of cyclohexane. Reaction mixture was stirred One week at room temperature in inert atmosphere (glovebox). Post-reaction mixture was extracted using hexane. After evaporation in vacuum crude product was dissolved in CHCl<sub>3</sub> and purified using Analtech silica gel GF 20 x 20 cm 1500 microns preparative TLC plate. White solid. Yield after separation on preparative TLC plate using hexane as the eluent ( $R_F = 0.46$ ): 0.1 % of Theory.

(4) 400 mg of Ag(II)SO<sub>4</sub> (2 mmol) was added to the solution of 207.1 mg 1-bromonaphthalene (1 mmol) in 10 ml of 1,1,1,3,3,3-hexafluoro-2-propanol. Reaction mixture was stirred 72 H at room temperature in inert atmosphere (glovebox). Post-reaction mixture was extracted using hexane. After evaporation in vacuum crude product was dissolved in CHCl<sub>3</sub> and purified using Analtech silica gel GF 20 x 20 cm 1500 microns preparative TLC plate. White solid. Yield after separation on preparative TLC plate using hexane as the eluent ( $R_F = 0.43$ ): 9.2 % of Theory.

(5) 400 mg of Ag(II)SO<sub>4</sub> (2 mmol) was added to the solution of 254.1 mg 1-iodonaphthalene (1 mmol) in 10 ml of 1,1,1,3,3,3-hexafluoro-2-propanol. Reaction mixture was stirred 72 H at room temperature in

inert atmosphere (glovebox). Post-reaction mixture was extracted using hexane. After evaporation in vacuum crude product was dissolved in  $\text{CHCl}_3$  and purified using Analtech silica gel GF 20 x 20 cm 1500 microns preparative TLC plate. White solid. Yield after separation on preparative TLC plate using hexane as the eluent ( $R_F = 0.45$ ): 2.2 % of Theory.

(6) 400 mg of  $\text{Ag(II)SO}_4$  (2 mmol) was added to the solution of 142.2 mg 1-methylnaphthalene (1 mmol) in 10 ml of 1,1,1,3,3,3-hexafluoro-2-propanol. Reaction mixture was stirred 72 H at room temperature in inert atmosphere (glovebox). Post-reaction mixture was extracted using hexane. After evaporation in vacuum crude product was dissolved in  $\text{CHCl}_3$  and purified using Analtech silica gel GF 20 x 20 cm 1500 microns preparative TLC plate. White solid. Yield after separation on preparative TLC plate Analtech silica gel GF 20 x 20 cm 1500 microns using hexane as the eluent ( $R_F = 0.48$ ): 9.2 % of Theory.

(7) 400 mg of  $\text{Ag(II)SO}_4$  (2 mmol) was added to the solution of 158.2 mg 1-methoxynaphthalene (1 mmol) in 10 ml of 1,1,1,3,3,3-hexafluoro-2-propanol. Reaction mixture was stirred 72 H at room temperature in inert atmosphere (glovebox). Post-reaction mixture was extracted using hexane. After evaporation in vacuum crude product was dissolved in  $\text{CHCl}_3$  and purified using Analtech silica gel GF 20 x 20 cm 1500 microns preparative TLC plate. White solid. Yield after separation on preparative TLC plate Analtech silica gel GF 20 x 20 cm 1500 microns using hexane as the eluent ( $R_F = 0.46$ ): 9.5 % of Theory.

(8) 400 mg of  $\text{Ag(II)SO}_4$  (2 mmol) was added to the solution of 204.3 mg 1-phenylnaphthalene (1 mmol) in 10 ml of 1,1,1,3,3,3-hexafluoro-2-propanol. Reaction mixture was stirred 72 H at room temperature in inert atmosphere (glovebox). Post-reaction mixture was extracted using hexane. After evaporation in vacuum crude product was dissolved in  $\text{CHCl}_3$  and purified using Analtech silica gel GF 20 x 20 cm 1500 microns preparative TLC plate. White waxy solid. Yield after separation on preparative TLC plate using hexane as the eluent ( $R_F = 0.61$ ): 0.1 % of Theory.

(9) 400 mg of  $\text{Ag(II)SO}_4$  (2 mmol) was added to the solution of 73 mg 1-fluoronaphthalene (0.5 mmol) and 81.7 mg 1-chloronaphthalene (0.5 mmol) in 10 ml of 1,1,1,3,3,3-hexafluoro-2-propanol. Reaction mixture was stirred 72 H at room temperature in inert atmosphere (glovebox). Post-reaction mixture was extracted using hexane. After evaporation in vacuum crude products was dissolved in  $\text{CHCl}_3$  and all 4,4'-substituted binaphthalene fractions was separated using Analtech silica gel GF 20 x 20 cm 1500 microns preparative TLC plate. White solid. Yield after separation on preparative TLC plate using hexane as the eluent ( $R_F = 0.43$ ): 3.0 % of Theory (jointly for all coupling products). Formation of (2), (3) as well as crossed-coupled product 4-chloro-4'-fluoro-1,1'-binaphthyl (9) has been confirmed using GC/MS technique.

(10) 400 mg of  $\text{Ag(II)SO}_4$  (2 mmol) was added to the solution of 73 mg 1-fluoronaphthalene (0.5 mmol) and 103.7 mg 1-bromonaphthalene (0.5 mmol) in 10 ml of 1,1,1,3,3,3-hexafluoro-2-propanol. Reaction mixture was stirred 72 H at room temperature in inert atmosphere (glovebox). Post-reaction mixture was extracted using hexane. After evaporation in vacuum crude products was dissolved in  $\text{CHCl}_3$  and all 4,4'-substituted binaphthalene fractions was separated using Analtech silica gel GF 20 x 20 cm 1500 microns preparative TLC plate. White solid. Yield after separation on preparative TLC plate using hexane as the eluent ( $R_F = 0.44$ ): 3.5 % of Theory (jointly for all coupling products). Formation of (2), (4) as well as crossed-coupled product 4-bromo-4'-fluoro-1,1'-binaphthyl (10) has been confirmed using GC/MS technique.

(13) 400 mg of  $\text{Ag(II)SO}_4$  (2 mmol) was added to the solution of 196.2 mg 1-(trifluoromethyl)-naphthalene (1 mmol) in 10 ml of 1,1,1,3,3,3-hexafluoro-2-propanol. Reaction mixture was stirred 72 H at room temperature in inert atmosphere (glovebox). Post-reaction mixture was extracted using hexane. After evaporation in vacuum crude product was dissolved in  $\text{CHCl}_3$  and purified using Analtech silica gel GF 20 x 20 cm 1500 microns preparative TLC plate. White solid. Yield after separation on preparative TLC plate using hexane as the eluent ( $R_F = 0.50$ ): 1.5 % of Theory.

(**13**) has also been obtained using 615 mg of Ag(II)SO<sub>4</sub> (3 mmol) and 588 mg 1-(trifluoromethyl)-naphthalene (3 mmol) reaction in 15 ml of nitromethane. Reaction time: 72 H. The 5,5'-bis(trifluoromethyl)-1,1'-binaphthyl (**13**) was detected (as the only detectable isomer) in the n-hexane extract of the crude reaction mixture using GC/MS technique; to signal from (**13**) was 25% of that for the 1-(trifluoromethyl)-naphthalene precursor, which points out to the high yield of *ca.* 50% (note, however, that the cross sections for ionization of substrate and product may differ). After evaporation in vacuum crude product was dissolved in CHCl<sub>3</sub> and purified using Analtech silica gel GF 20 x 20 cm 1500 microns preparative TLC plate. (**13**) White solid crystallizing from viscous oil with some difficulty at room temperature, and fast at +5 °C. Yield after separation on preparative TLC plate using hexane as the eluent (R<sub>F</sub> = 0.50): 17 % of Theory.

(**14**) 40 mg of Ag(II)SO<sub>4</sub> (0.2 mmol) was added to the solution of 15.4 mg 1-cyanonaphthalene (0.1 mmol) in 1 ml of 1,1,1,3,3,3-hexafluoro-2-propanol. Reaction mixture was stirred 72 H at room temperature in inert atmosphere (glovebox). Reaction time: 72 H. Post-reaction mixture was extracted using hexane. Formation of small amounts of (**14**) was confirmed using GC/MS technique.

(**15**) 40 mg of Ag(II)SO<sub>4</sub> (0.2 mmol) was added to the solution of 17.3 mg 1-nitronaphthalene (0.1 mmol) in 1 ml of 1,1,1,3,3,3-hexafluoro-2-propanol. Reaction mixture was stirred 72 H at room temperature in inert atmosphere (glovebox). Reaction time: 72 H. Post-reaction mixture was extracted using hexane. (**15**) has not been detected with GC/MS technique.

(**16+17+18+25**) 40 mg of Ag(II)SO<sub>4</sub> (0.2 mmol) was added to the solution of 14.6 mg 2-fluoronaphthalene (0.1 mmol) in 1 ml of 1,1,1,3,3,3-hexafluoro-2-propanol. Reaction mixture was stirred 72 H at room temperature in inert atmosphere (glovebox). Post-reaction mixture was extracted using hexane. Formation of small amounts of (**16+17+18**) and (**25**) (unknown isomer) has been confirmed using GC/MS technique.

(**19+20+21+26**) 40 mg of Ag(II)SO<sub>4</sub> (0.2 mmol) was added to the solution of 16.3 mg 2-chloronaphthalene (0.1 mmol) in 1 ml of 1,1,1,3,3,3-hexafluoro-2-propanol. Reaction mixture was stirred 72 H at room temperature in inert atmosphere (glovebox). Post-reaction mixture was extracted using hexane. Formation of small amounts of (**19+20+21**) and (**26**) (unknown isomer) has been confirmed using GC/MS technique.

(**22+23+24+27+28**) 400 mg of Ag(II)SO<sub>4</sub> (2 mmol) was added to the solution of 207.1 mg 2-bromonaphthalene (1 mmol) in 100 ml of 1,1,1,3,3,3-hexafluoro-2-propanol. Reaction mixture was stirred 72 H at room temperature in inert atmosphere (glovebox). Post-reaction mixture was extracted using hexane. After evaporation in vacuum crude product was dissolved in CHCl<sub>3</sub> and purified using Analtech silica gel GF 20 x 20 cm 1500 microns preparative TLC plate. (**22**) White solid. Yield after separation on preparative TLC plate using hexane as the eluent (R<sub>F</sub> = 0.43): 1.2 % of Theory. (**23**) White solid. Yield after separation on preparative TLC plate using hexane as the eluent (R<sub>F</sub> = 0.46): 2.5 % of Theory. Formation of (**24**) and (**27**) (unknown isomer) has been confirmed using GC/MS technique. Formation of (**27**) (unknown isomer) and (**28**) (unknown isomer) has been confirmed using ESI/TOF technique (Agilent 6890N).

### ***S3. Results table.***

| Substrate              | Product(s) & yields (HFIP)                                                                    |
|------------------------|-----------------------------------------------------------------------------------------------|
| Naphtalene             | <b>1</b> (6.5%) + <b>11</b> (< 0.1%)                                                          |
| <b>1-R-derivatives</b> |                                                                                               |
| F                      | <b>2</b> (3.8%) + <b>12</b> (<0.1%)                                                           |
| Cl                     | <b>3</b> (7.0%)                                                                               |
| Br                     | <b>4</b> (9.2%)                                                                               |
| I                      | <b>5</b> (2.2%)                                                                               |
| Me                     | <b>6</b> (9.2%)                                                                               |
| OMe                    | <b>7</b> (9.5%)                                                                               |
| Ph                     | <b>8</b> (0.1%)                                                                               |
| F/Cl                   | <b>2</b> + <b>3</b> + <b>9</b> (3.0%)                                                         |
| F/Br                   | <b>2</b> + <b>4</b> + <b>10</b> (3.5%)                                                        |
| CF <sub>3</sub>        | <b>13</b> (1.5%)                                                                              |
| CN                     | <b>14</b> (<0.1%)                                                                             |
| NO <sub>2</sub>        | ---                                                                                           |
| <b>2-R-derivatives</b> |                                                                                               |
| F                      | <b>16</b> (0.5%) + <b>17</b> (1.0%) + <b>18</b> (0.5%) + <b>25</b> (0.1%)                     |
| Cl                     | <b>19</b> (0.5%) + <b>20</b> (1.0%) + <b>21</b> (0.5%) + <b>26</b> (0.1%)                     |
| Br                     | <b>22</b> (1.2%) + <b>23</b> (2.5%) + <b>24</b> (1.2%) + <b>27</b> (0.1%) + <b>28</b> (<0.1%) |

### ***S4. Description of products obtained.***

(1) White solid; Formation of 1,1'-binaphthyl has been confirmed using gc-ms technique via comparison of fragmentation pathway and retention time with the corresponding values that have been obtained using reference 1,1'-binaphthyl sample; MS m/z (%) 255 (M+ +1, 21); 254 (M+, 80); 253 (100); 250 (30); 239 (26); 126 (50); 113 (25); Agilent 7890A & 5975 spectrometer (EI ionization) with standard HP-5MS column 30 m/0.25 mm/0.5  $\mu$ m, 40 C at 5 min., 10 K/min; T<sub>end</sub>: 325 C; RT 26.800 min.

(2) White solid; IR (KBr, cm<sup>-1</sup>): 653, 792, 985, 1127, 1307, 1378, 1465, 1731, 2919, 2922, 2960; <sup>1</sup>H NMR (500 MHz, CDCl<sub>3</sub>, ppm, 298.1 K): 7.219-7.225 (multiplet, 2H), 7.327-7.347 (multiplet, 4H), 7.347-7.382 (quartet, 2H), 7.505-7.538 (septet, 2H), 8.193-8.210 (doublet, 2H); <sup>13</sup>C-NMR (125 MHz, CDCl<sub>3</sub>, ppm, 298.1 K): 159.605, 157.599, 134.225, 134.187, 133.685, 133.648, 127.799, 127.735, 127.023, 126.399, 126.377, 126.198, 126.183, 123.769, 123.638, 120.768, 120.725, 109.054, 108.895; <sup>19</sup>F-NMR (500 MHz, CDCl<sub>3</sub>, ppm, 298.1 K): (-123.414)-(-123.468) (quartet, 1F); MS m/z (%) 291 (M+ +1, 19); 290 (M+, 100); 289 (85); 288 (85); 275 (24); 270 (24); 144 (45); 135 (24); Agilent 7890A & 5975 spectrometer (EI ionization) with standard HP-5MS column 30 m/0.25 mm/0.5  $\mu$ m, 40 C at 5 min., 10 K/min; T<sub>end</sub>: 325 C; RT 26.413 min.

(3) White solid; IR (KBr, cm<sup>-1</sup>): 201, 412, 496, 539, 757, 2852, 2922, 2954, 3077; <sup>1</sup>H NMR (500 MHz, CDCl<sub>3</sub>, ppm, 298.1 K): 7.347-7.359 (multiplet, 4H), 7.369-7.390 (doublet, 2H), 7.579-7.612 (septet, 2H), 7.679-7.694 (doublet, 2H), 8.378-8.399 (doublet of triplets, 2H); <sup>13</sup>C-NMR (125 MHz, CDCl<sub>3</sub>, ppm, 298.1 K): 136.937, 133.875, 132.060, 130.772, 128.788, 127.751, 127.697, 127.090, 127.071, 126.945, 126.924, 126.899, 126.498, 126.297, 126.672, 124.728, 124.683; MS m/z (%) 324 (M+ +1, 25); 322 (M+ -1, 50); 286 (50); 252 (100); 143 (30); 125 (75); 112 (16); Agilent 7890A & 5975 spectrometer (EI ionization) with standard HP-5MS column 30 m/0.25 mm/0.5  $\mu$ m, 40 C at 5 min., 10 K/min; T<sub>end</sub>: 325 C; RT 30.087 min.

(4) White solid; IR (KBr,  $\text{cm}^{-1}$ ): 210, 411, 491, 759, 818, 2850, 2920, 2959;  $^1\text{H}$  NMR (500 MHz,  $\text{CDCl}_3$ , ppm, 298.1 K): 7.302-7.321 (doublet, 2H), 7.333-7.344 (multiplet, 4H), 7.573-7.606 (septet, 2H), 7.887-7.902 (doublet, 2H), 8.346-8.367 (doublet of triplets, 2H);  $^{13}\text{C}$ -NMR (125 MHz,  $\text{CDCl}_3$ , ppm, 298.1 K): 137.656, 133.908, 131.959, 129.471, 128.133, 127.478, 127.419, 127.009, 126.952, 123.019; MS  $m/z$  (%) 414 ( $\text{M}^+$  +2, 25); 412 ( $\text{M}^+$ , 45); 410 (25); 332 (15); 330 (15) 252 (100); 125 (50); 112 (24); Agilent 7890A & 5975 spectrometer (EI ionization) with standard HP-5MS column 30 m/0.25 mm/0.5  $\mu\text{m}$ , 40 C at 5 min., 10 K/min;  $T_{\text{end}}$ : 325 C; RT 31.907 min.

(5) White solid; IR (KBr,  $\text{cm}^{-1}$ ): 200, 409, 454, 766, 756, 781, 790, 810, 832, 2850, 2918, 2958;  $^1\text{H}$  NMR (500 MHz,  $\text{CDCl}_3$ , ppm, 298.1 K): 7.162-7.177 (doublet, 2H), 7.257-7.339 (multiplet, 4H), 7.548-7.581 (septet, 2H), 8.194-8.213 (doublet of triplets, 4H);  $^{13}\text{C}$ -NMR (125 MHz,  $\text{CDCl}_3$ , ppm, 298.1 K): 138.647, 137.010, 134.258, 133.404, 132.636, 132.557, 128.751, 127.809, 127.122, 127.076; MS  $m/z$  (%) 507 ( $\text{M}^+$  +1, 12); 506 ( $\text{M}^+$ , 45); 378 (7); 252 (100); 126 (85); 113 (24); Agilent 7890A & 5975 spectrometer (EI ionization) with standard HP-5MS column 30 m/0.25 mm/0.5  $\mu\text{m}$ , 40 C at 5 min., 10 K/min;  $T_{\text{end}}$ : 325 C; RT 34.865 min.

(6) White solid;  $^1\text{H}$  NMR (500 MHz,  $\text{CDCl}_3$ , ppm, 298.1 K): 2.820 (singlet, 6H), 7.300 (triplet of doublets, 2H, 8.4, 6.6, 1.2 Hz), 7.400-7.450 (multiplet, 6H), 7.520 (triplet of doublets, 2H, 8.6, 6.6, 1.4 Hz), 8.115 (doublet, 2H, 8.6 Hz);  $^{13}\text{C}$ -NMR (125 MHz,  $\text{CDCl}_3$ , ppm, 298.1 K): 136.820, 136.350, 135.820, 134.340, 133.540, 132.750, 132.030, 132.020 128.590, 128.170, 128.120, 127.860, 127.690, 127.420, 127.340, 126.360, 125.820, 124.770, 124.760, 124.740. 124.700, 21.780, 20.570; MS  $m/z$  (%) 283 ( $\text{M}^+$  +1, 27); 282 ( $\text{M}^+$ , 100); 267 (44); 252 (44); 131 (40); 126 (85); Agilent 7890A & 5975 spectrometer (EI ionization) with standard HP-5MS column 30 m/0.25 mm/0.5  $\mu\text{m}$ , 40 C at 5 min., 10 K/min;  $T_{\text{end}}$ : 325 C; RT 28.861 min.

(7) White solid;  $^1\text{H}$  NMR (500 MHz,  $\text{CDCl}_3$ , ppm, 298.1 K): 4.090 (singlet, 3H), 6.920 (doublet, 1H), 7.300 (doublet of doublets, 1H), 7.380 (doublet, 1H), 7.390 (doublet, 1H), 7.460 (doublet of doublets, 1H), 8.360 (doublet, 1H);  $^{13}\text{C}$ -NMR (125 MHz,  $\text{CDCl}_3$ , ppm, 298.1 K): 155.010, 134.030, 130.700, 128.030, 126.420, 126.300. 125.520, 125.010, 103.400, 55.600; MS  $m/z$  (%) 315 ( $\text{M}^+$  +1, 20); 314 ( $\text{M}^+$ , 100); 299 (35); 268 (25); 239 (25); 226 (25); 113 (20); Agilent 7890A & 5975 spectrometer (EI ionization) with standard HP-5MS column 30 m/0.25 mm/0.5  $\mu\text{m}$ , 40 C at 5 min., 10 K/min;  $T_{\text{end}}$ : 325 C; RT 30.941 min.

(8) White waxy solid; MS  $m/z$  (%) 407 ( $\text{M}^+$  +1, 32); 406 ( $\text{M}^+$ , 100); 328 (25); 326 (25); 200 (10); 163 (10); Agilent 7890A & 5975 spectrometer (EI ionization) with standard HP-5MS column 30 m/0.25 mm/0.5  $\mu\text{m}$ , 40 C at 5 min., 10 K/min;  $T_{\text{end}}$ : 325 C; RT 42.994 min.

(9) White solid; IR (KBr,  $\text{cm}^{-1}$ ): 709, 761, 823, 1042, 1233, 1256, 1381, 1458, 1505, 1600, 2849, 2926, 2958, 3067;  $^1\text{H}$  NMR (500 MHz,  $\text{CDCl}_3$ , ppm, 298.1 K): 7.110-8.470 (multiplets);  $^{13}\text{C}$ -NMR (125 MHz,  $\text{CDCl}_3$ , ppm, 298.1 K): 111.580-162.150 range;  $^{19}\text{F}$ -NMR (500 MHz,  $\text{CDCl}_3$ , ppm, 298.1 K): (-123.414)-(-123.468) (quartet, 1F); MS  $m/z$  (%) 307 ( $\text{M}^+$  +1, 15); 306 ( $\text{M}^+$ , 60); 291 (20); 270 (100); 135 (100); 122 (25); Agilent 7890A & 5975 spectrometer (EI ionization) with standard HP-5MS column 30 m/0.25 mm/0.5  $\mu\text{m}$ , 40 C at 5 min., 10 K/min;  $T_{\text{end}}$ : 325 C; RT 28.288 min.

(10) White solid; IR (KBr,  $\text{cm}^{-1}$ ): 709, 760, 824, 1041, 1233, 1256, 1381, 1458, 1503, 1599, 2856, 2924, 2960, 3067;  $^1\text{H}$  NMR (500 MHz,  $\text{CDCl}_3$ , ppm, 298.1 K): 7.110-8.470 (multiplets);  $^{13}\text{C}$ -NMR (125 MHz,  $\text{CDCl}_3$ , ppm, 298.1 K): 113.580-167.150 range;  $^{19}\text{F}$ -NMR (500 MHz,  $\text{CDCl}_3$ , ppm, 298.1 K): (-123.414)-(-123.468) (quartet, 1F); MS  $m/z$  (%) 353 ( $\text{M}^+$  +1, 9); 352 ( $\text{M}^+$ , 34); 335 (3.5); 270 (90); 135 (100); 122 (30); Agilent 7890A & 5975 spectrometer (EI ionization) with standard HP-5MS column 30 m/0.25 mm/0.5  $\mu\text{m}$ , 40 C at 5 min., 10 K/min;  $T_{\text{end}}$ : 325 C; RT 29.177 min.

(11) Formation of ternaphthyl has been confirmed using gc-ms technique; MS  $m/z$  (%) 381 ( $\text{M}^+$  +1, 14); 380 ( $\text{M}^+$ , 100); 252 (60); 182 (50); 125 (21); Agilent 7890A & 5975 spectrometer (EI ionization) with standard HP-5MS column 30 m/0.25 mm/0.5  $\mu\text{m}$ , 40 C at 5 min., 10 K/min;  $T_{\text{end}}$ : 325 C; RT 38.543 min.

(12) Formation of trifluoroternaphthyl has been confirmed using gc-ms technique; MS m/z (%) 435 (M+ +1, 19); 434 (M+, 100); 412 (15); 288 (50); 206 (30); 146 (24); 64 (15); Agilent 7890A & 5975 spectrometer (EI ionization) with standard HP-5MS column 30 m/0.25 mm/0.5  $\mu$ m, 40 C at 5 min., 10 K/min; T<sub>end</sub>: 325 C; RT 38.087 min.

(13) White solid; IR (KBr, cm<sup>-1</sup>): 653, 792, 985, 1123, 1128, 1138, 1151, 1307, 1378, 1463, 2849, 2870, 2905, 2925, 2959; <sup>1</sup>H NMR (500 MHz, CDCl<sub>3</sub>, ppm, 298.1 K): 7.070-8.330 (multiplets); <sup>13</sup>C-NMR (125 MHz, CDCl<sub>3</sub>, ppm, 298.1 K): 141.300, 135.880, 133.660, 131.780, 131.740, 131.270, 129.740, 129.110, 128.910, 128.710, 1289.300, 127.530, 127.490, 127.150, 127.120, 127.110, 127.090, 127.070, 126.620, 126.480; <sup>19</sup>F-NMR (500 MHz, CDCl<sub>3</sub>, ppm, 298.1 K): (-59.310)-(-59.790) (multiplet, 3F); MS m/z (%) 391 (M+ +1, 20); 390 (M+, 90); 321 (60); 252 (100); 126 (30); Agilent 7890A & 5975 spectrometer (EI ionization) with standard HP-5MS column 30 m/0.25 mm/0.5  $\mu$ m, 40 C at 5 min., 10 K/min; T<sub>end</sub>: 325 C; RT 25.809 min.

(14) Formation of 5,5'-di(cyano)-1,1'-binaphthyl has been confirmed using gc-ms technique; MS m/z (%) 305 (M+ +1, 21); 304 (M+, 100); 125 (20); Agilent 7890A & 5975 spectrometer (EI ionization) with standard HP-5MS column 30 m/0.25 mm/0.5  $\mu$ m, 40 C at 5 min., 10 K/min; T<sub>end</sub>: 325 C; RT 32.175 min.

(15) Compound is not formed under the reaction conditions.

(16) Formation of 2,2'-difluorobinaphthyl has been confirmed using gc-ms technique; MS m/z (%) 291 (M+ +1, 24); 290 (M+, 100); 270 (24); 144 (34); 135 (24); Agilent 7890A & 5975 spectrometer (EI ionization) with standard HP-5MS column 30 m/0.25 mm/0.5  $\mu$ m, 40 C at 5 min., 10 K/min; T<sub>end</sub>: 325 C; RT 26.930 min.

(17) Formation of 2,7'-difluorobinaphthyl has been confirmed using gc-ms technique; MS m/z (%) 291 (M+ +1, 24); 290 (M+, 100); 270 (50); 144 (50); 135 (35); Agilent 7890A & 5975 spectrometer (EI ionization) with standard HP-5MS column 30 m/0.25 mm/0.5  $\mu$ m, 40 C at 5 min., 10 K/min; T<sub>end</sub>: 325 C; RT 26.992 min.

(18) Formation of 7,7'-difluorobinaphthyl has been confirmed using gc-ms technique; MS m/z (%) 291 (M+ +1, 24); 290 (M+, 100); 270 (35); 144 (25); 135 (35); Agilent 7890A & 5975 spectrometer (EI ionization) with standard HP-5MS column 30 m/0.25 mm/0.5  $\mu$ m, 40 C at 5 min., 10 K/min; T<sub>end</sub>: 325 C; RT 27.036 min.

(19) Formation of 2,2'-dichlorobinaphthyl has been confirmed using gc-ms technique; MS m/z (%) 324 (M+ +1, 36); 322 (M+ -1, 48); 286 (15); 252 (100); 143 (20); 125 (50); 112 (15); Agilent 7890A & 5975 spectrometer (EI ionization) with standard HP-5MS column 30 m/0.25 mm/0.5  $\mu$ m, 40 C at 5 min., 10 K/min; T<sub>end</sub>: 325 C; RT 29.257 min.

(20) Formation of 2,7'-dichlorobinaphthyl has been confirmed using gc-ms technique; MS m/z (%) 324 (M+ +1, 25); 322 (M+ -1, 40); 286 (28); 252 (100); 143 (15); 125 (40); 112 (15); Agilent 7890A & 5975 spectrometer (EI ionization) with standard HP-5MS column 30 m/0.25 mm/0.5  $\mu$ m, 40 C at 5 min., 10 K/min; T<sub>end</sub>: 325 C; RT 29.698 min.

(21) Formation of 7,7'-dichlorobinaphthyl has been confirmed using gc-ms technique; MS m/z (%) 324 (M+ +1, 54); 322 (M+ -1, 72); 287 (20); 252 (100); 143 (15); 125 (40); 112 (15); Agilent 7890A & 5975 spectrometer (EI ionization) with standard HP-5MS column 30 m/0.25 mm/0.5  $\mu$ m, 40 C at 5 min., 10 K/min; T<sub>end</sub>: 325 C; RT 30.051 min.

(22) White solid; Yield after separation on preparative TLC plate Analtech silica gel GF 20 x 20 cm 1500 microns using hexane as the eluent (R<sub>F</sub> = 0.42): 1.25 % of Theory; IR (KBr, cm<sup>-1</sup>): 210, 411, 491, 759, 818, 2850, 2920, 2959; <sup>1</sup>H NMR (500 MHz, CDCl<sub>3</sub>, ppm, 298.1 K): 7.076-7.094 (doublet of doublets, 2H),

7.269-7.303 (multiplet, 2H), 7.462-7.494 (multiplet, 2H), 7.796-7.814 (doublet, 2H), 7.842-7.860 (doublet, 2H), 7.902-7.918 (doublet, 2H);  $^{13}\text{C}$ -NMR (125 MHz,  $\text{CDCl}_3$ , ppm, 298.1 K): 137.100, 133.296, 132.361, 129.977, 129.792, 128.252, 127.389, 126.352, 125.826, 122.724; MS  $m/z$  (%) 414 ( $\text{M}^+ + 2$ , 10); 412 ( $\text{M}^+$ , 25); 410 (10); 332 (1); 330 (1) 252 (100); 126 (60); 113 (18); Agilent 7890A & 5975 spectrometer (EI ionization) with standard HP-5MS column 30 m/0.25 mm/0.5  $\mu\text{m}$ , 40 C at 5 min., 10 K/min;  $T_{\text{end}}$ : 325 C; RT 30.571 min.

(23) White solid; Yield after separation on preparative TLC plate Analtech silica gel GF 20 x 20 cm 1500 microns using hexane as the eluent ( $R_f = 0.44$ ): 2.5 % of Theory; IR (KBr,  $\text{cm}^{-1}$ ): 210, 411, 491, 759, 818, 2850, 2920, 2959;  $^1\text{H}$  NMR (500 MHz,  $\text{CDCl}_3$ , ppm, 298.1 K): 7.131-7.150 (doublet of doublets, 1H), 7.282-7.315 (multiplet, 1H), 7.360-7.364 (doublet, 1H), 7.407-7.423 (doublet, 1H), 7.482-7.514 (multiplet, 1H), 7.553-7.574 (doublet of doublets, 1H), 7.628-7.658 (multiplet, 1H), 7.794-7.860 (multiplet, 3H), 7.912-7.929 (doublet, 1H), 7.951-7.967 (doublet, 1H);  $^{13}\text{C}$ -NMR (125 MHz,  $\text{CDCl}_3$ , ppm, 298.1 K): 137.174, 136.661, 134.260, 133.189, 132.371, 132.116, 130.086, 129.999, 129.665, 129.596, 128.286, 128.205, 128.116, 127.772, 127.157, 126.512, 126.260, 126.005, 122.755, 120.792; MS  $m/z$  (%) 414 ( $\text{M}^+ + 2$ , 10); 412 ( $\text{M}^+$ , 15); 410 (10); 332 (1); 330 (1) 252 (100); 126 (50); 113 (25); Agilent 7890A & 5975 spectrometer (EI ionization) with standard HP-5MS column 30 m/0.25 mm/0.5  $\mu\text{m}$ , 40 C at 5 min., 10 K/min;  $T_{\text{end}}$ : 325 C; RT 31.082 min.

(24) Formation of 7,7'-dibromobinaphthyl has been confirmed using gc-ms technique; MS  $m/z$  (%) 414 ( $\text{M}^+ + 2$ , 30); 412 ( $\text{M}^+$ , 55); 410 (30); 332 (6); 330 (4) 252 (100); 126 (90); 113 (25); Agilent 7890A & 5975 spectrometer (EI ionization) with standard HP-5MS column 30 m/0.25 mm/0.5  $\mu\text{m}$ , 40 C at 5 min., 10 K/min;  $T_{\text{end}}$ : 325 C; RT 31.506 min.

(25) Formation of trifluoroternaphthyl has been confirmed using gc-ms; Agilent 7890A & 5975 spectrometer (EI ionization) with standard HP-5MS column 30 m/0.25 mm/0.5  $\mu\text{m}$ , 40 C at 5 min., 10 K/min;  $T_{\text{end}}$ : 325 C; RT 35.199 min.

(26) Formation of trichloroternaphthyl has been confirmed using gc-ms; Agilent 7890A & 5975 spectrometer (EI ionization) with standard HP-5MS column 30 m/0.25 mm/0.5  $\mu\text{m}$ , 40 C at 5 min., 10 K/min;  $T_{\text{end}}$ : 325 C; RT 41.643 min.

(27) Formation of tribromoternaphthyl has been confirmed using gc-ms and esi-tof technique (Agilent 6890N); Agilent 7890A & 5975 spectrometer (EI ionization) with standard HP-5MS column 30 m/0.25 mm/0.5  $\mu\text{m}$ , 40 C at 5 min., 10 K/min;  $T_{\text{end}}$ : 325 C; RT 48.359 min.

(28) Formation of tetrabromoquaternaphthyl has been confirmed using esi-tof technique (Agilent 6890N).

Due to excessive amount of data, all crystal structures and spectra will be shown and analyzed in detail elsewhere. An example of the esi-tof spectrum, that for the most complex molecules, (28) and (27), are shown below (experimental spectrum at the bottom), together with the theoretical isotope patterns (at the top):



(28)

PJL\_mm0807 (0.054) Is (1.00,1.00) C<sub>40</sub>H<sub>22</sub>Br<sub>4</sub>

1: TOF MS ES+  
2.59e12

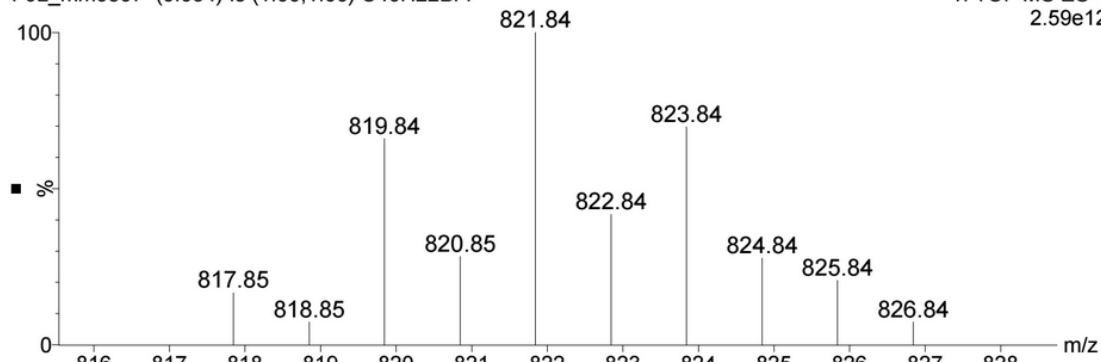

PJL\_mm0807 16 (0.327) Cm (11:16-6:8)

1: TOF MS ES+  
2.71e3

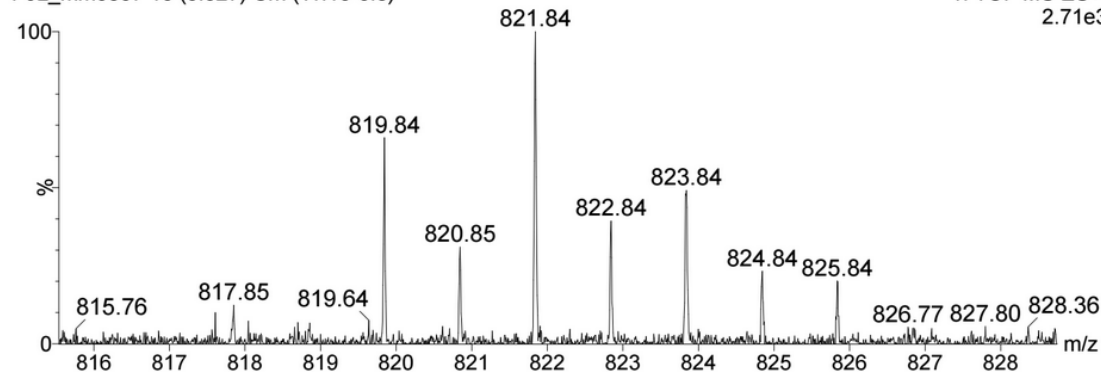

(27)

PJL\_mm0807 (0.054) Is (1.00,1.00) C<sub>30</sub>H<sub>17</sub>Br<sub>3</sub>

1: TOF MS ES+  
2.81e12

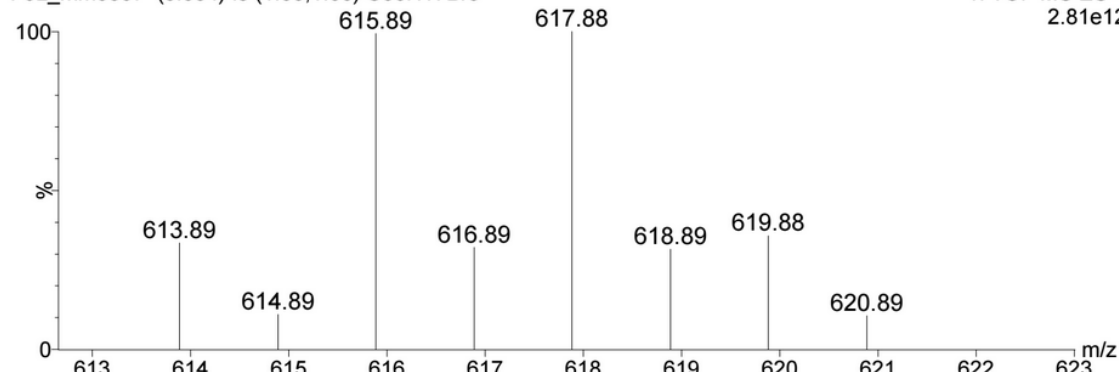

PJL\_mm0807 16 (0.327) Cm (11:16-6:8)

1: TOF MS ES+  
9.76e3

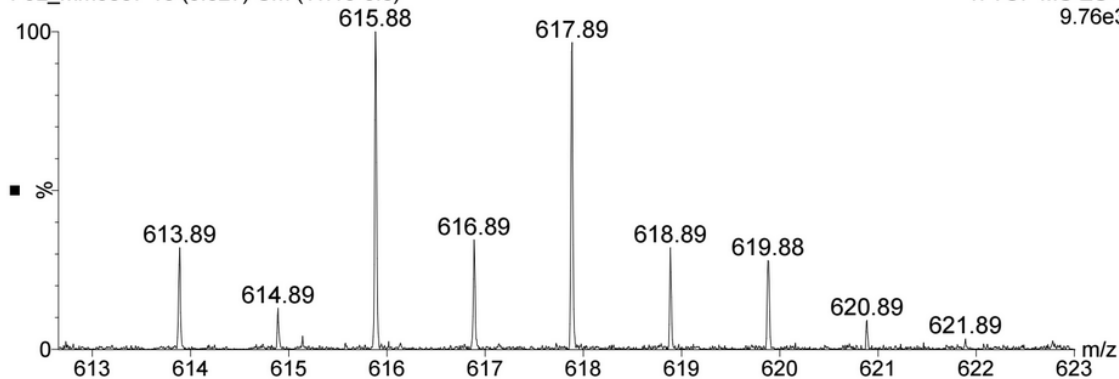

***S5. A typical powder XRD of the solid post-reaction residue.***

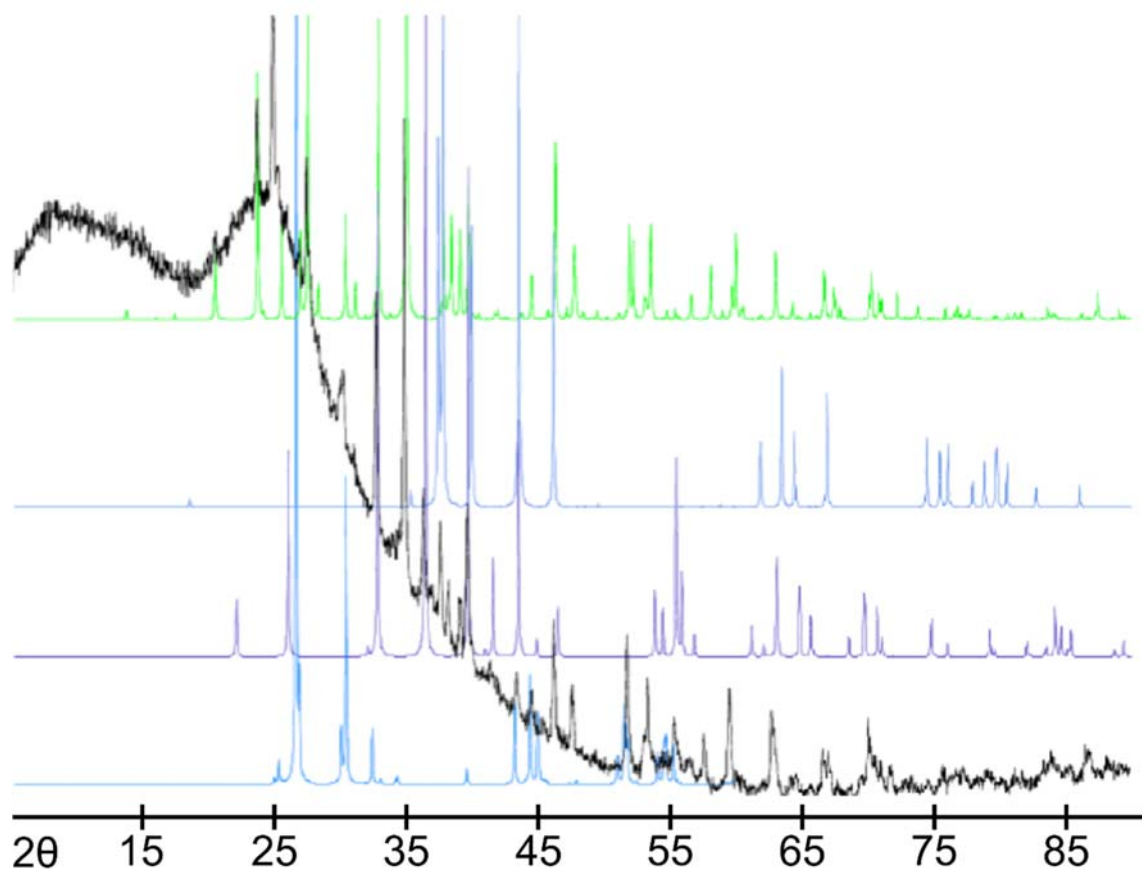

Co lamp  $\lambda_1 = 1.78901$ ,  $\lambda_2 = 1.79290$  Å.

Black - diffraction pattern of the post reaction silver salts phase

Green - diffraction pattern of  $\text{Ag(I)HSO}_4$

Blue - diffraction pattern of  $\text{Ag(II)SO}_4$

Violet - diffraction pattern of  $\text{Ag(I)Ag(III)O}_2$

Light blue – diffraction pattern of  $\text{Ag(I)}_2\text{SO}_4$

Solid post-reaction residue contains mostly  $\text{Ag(I)HSO}_4$ , however formation of small amount of metallic silver colloid has been also observed in some cases.

## ***S6. NMR Spectra for 5,5'-bis(trifluoromethyl)-1,1'-binaphthyl***

5,5'-bis(trifluoromethyl)-1,1'-binaphthyl C<sub>22</sub>H<sub>12</sub>F<sub>6</sub> NMR spectra

<sup>1</sup>H NMR (500 MHz, CDCl<sub>3</sub>, ppm, 298.1 K):

**7.070-8.330 (multiplets)**

Signals in 0-6.5 ppm range: TMS and occluded organic solvents.

<sup>13</sup>C-NMR (125MHz, CDCl<sub>3</sub>, ppm, 298.1 K):

**141.300, 135.880, 133.660, 131.780, 131.740, 131.270, 129.740, 129.110,**

**128.910, 128.710, 1289.300, 127.530, 127.490, 127.150, 127.120, 127.110,**

**127.090, 127.070, 126.620, 126.480.**

<sup>19</sup>F-NMR (500 MHz, CDCl<sub>3</sub>, ppm, 298.1 K):

**(-59.310)-(-59.790) (multiplet, 3F).**

### 5,5'-bis(trifluoromethyl)-1,1'-binaphthyl <sup>1</sup>H NMR

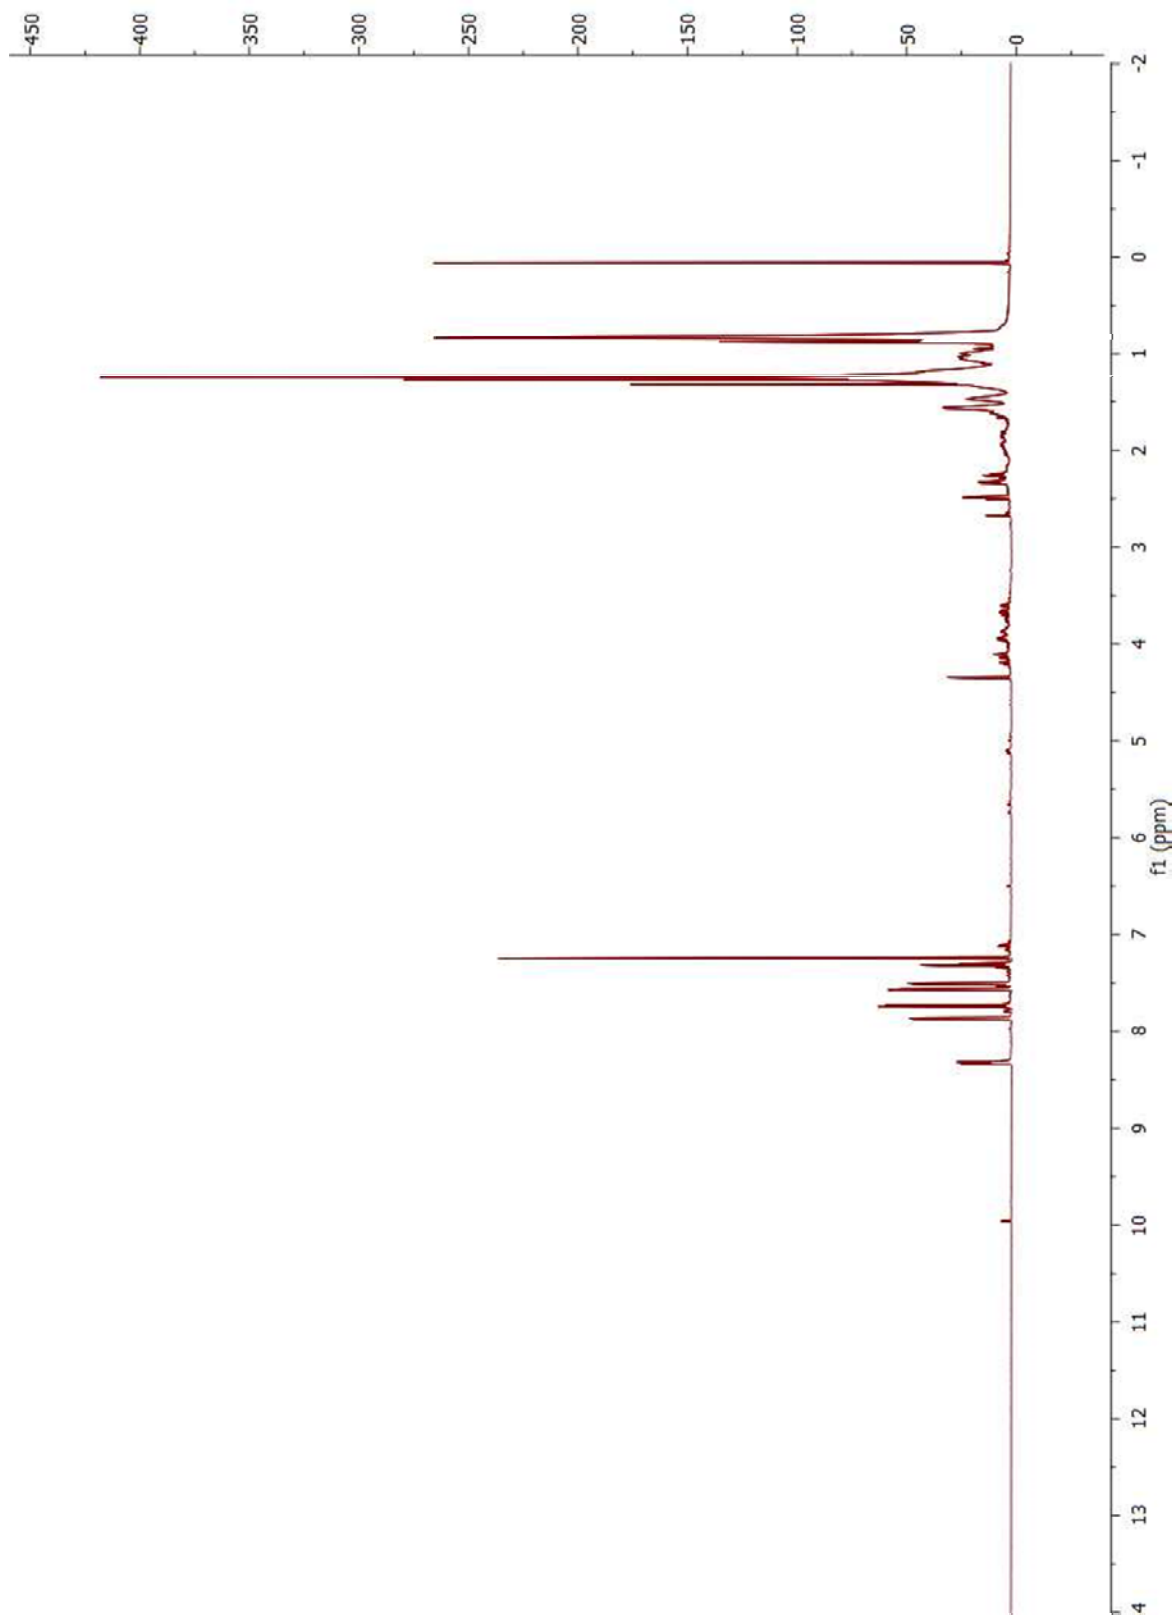

# 5,5'-bis(trifluoromethyl)-1,1'-binaphthyl <sup>1</sup>H NMR

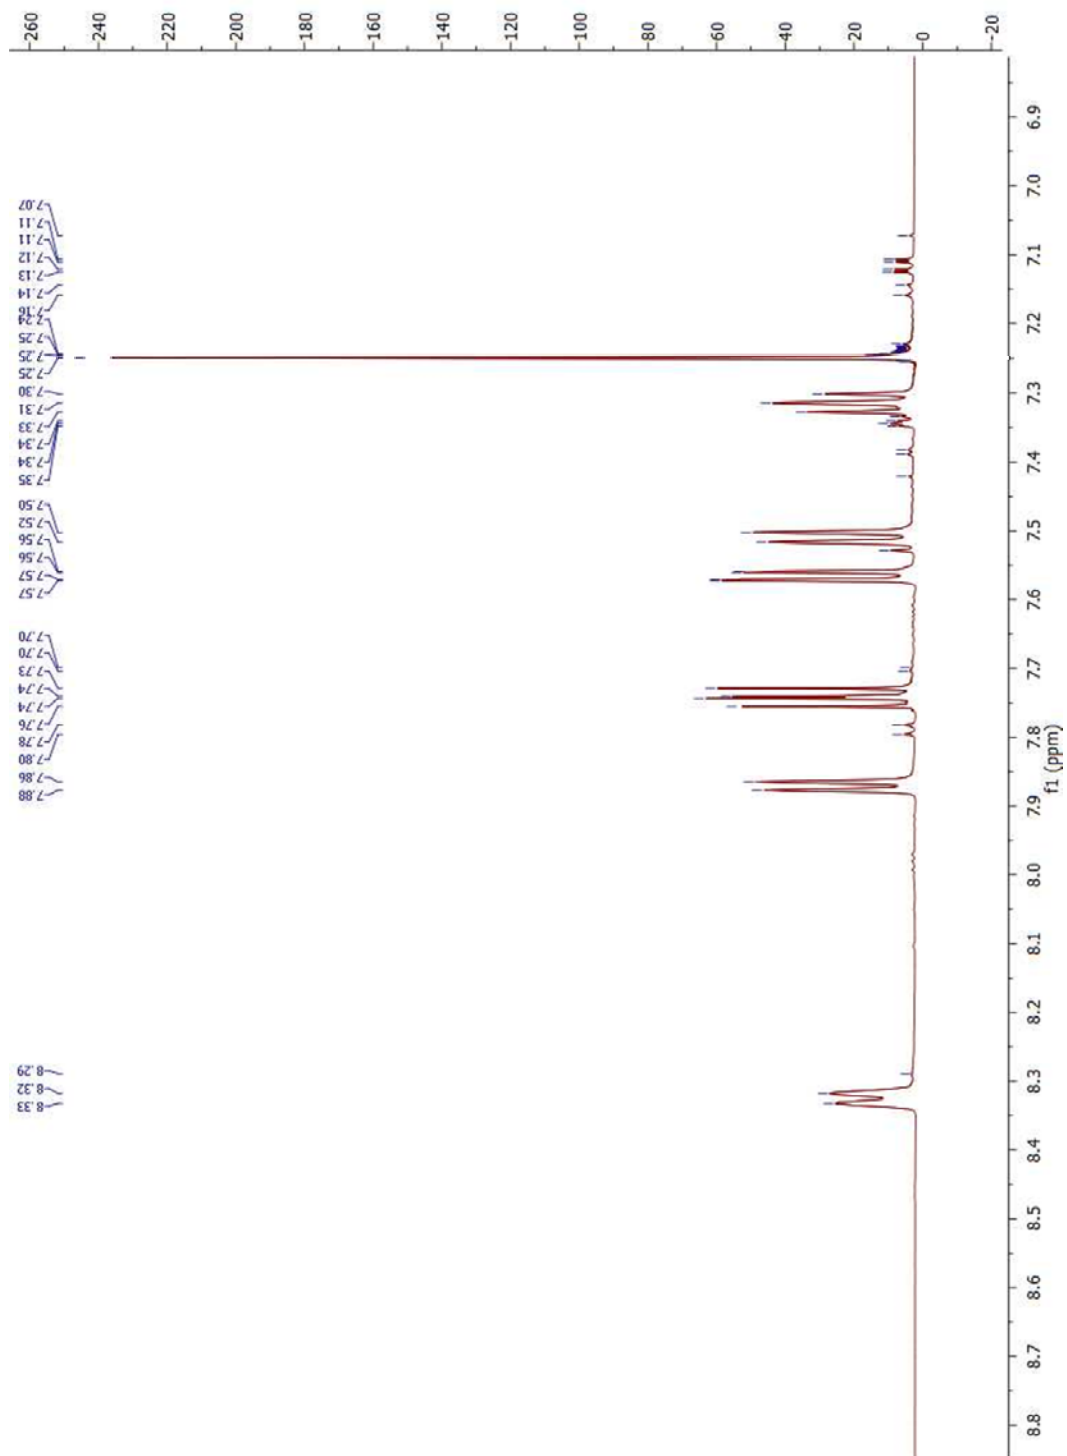

# 5,5'-bis(trifluoromethyl)-1,1'-binaphthyl <sup>13</sup>C NMR

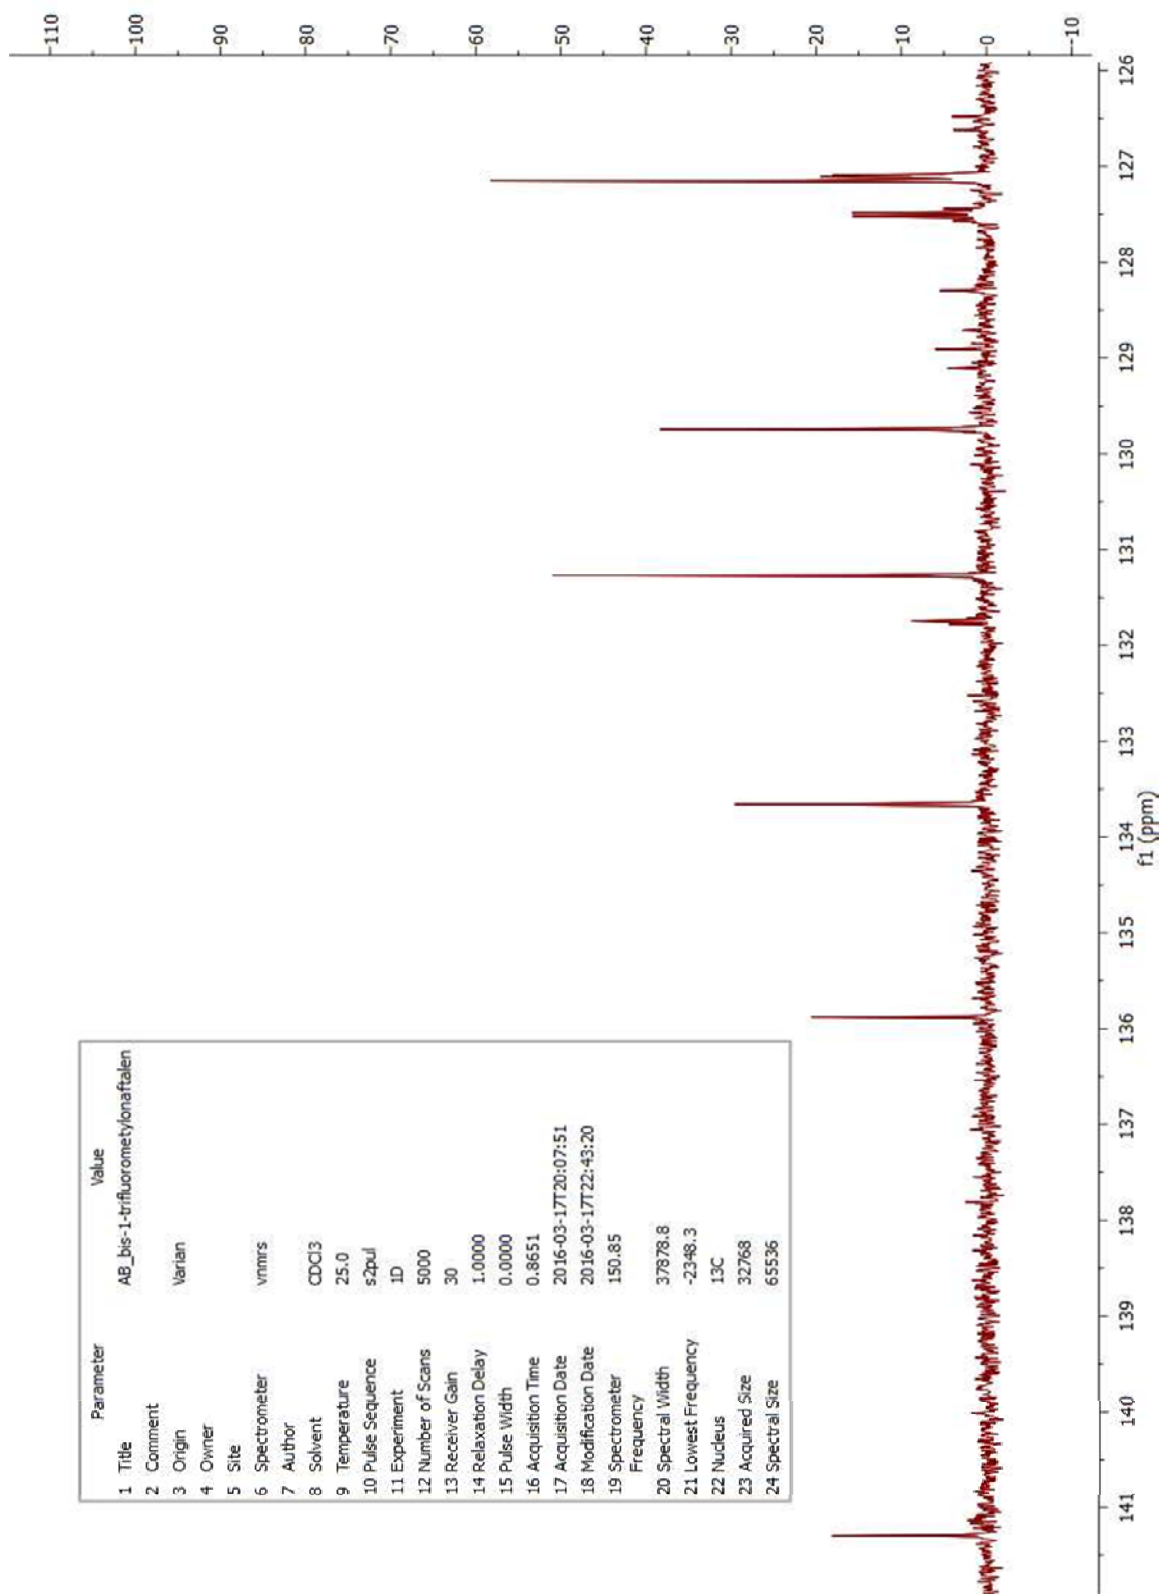

### 5,5'-bis(trifluoromethyl)-1,1'-binaphthyl <sup>13</sup>C NMR

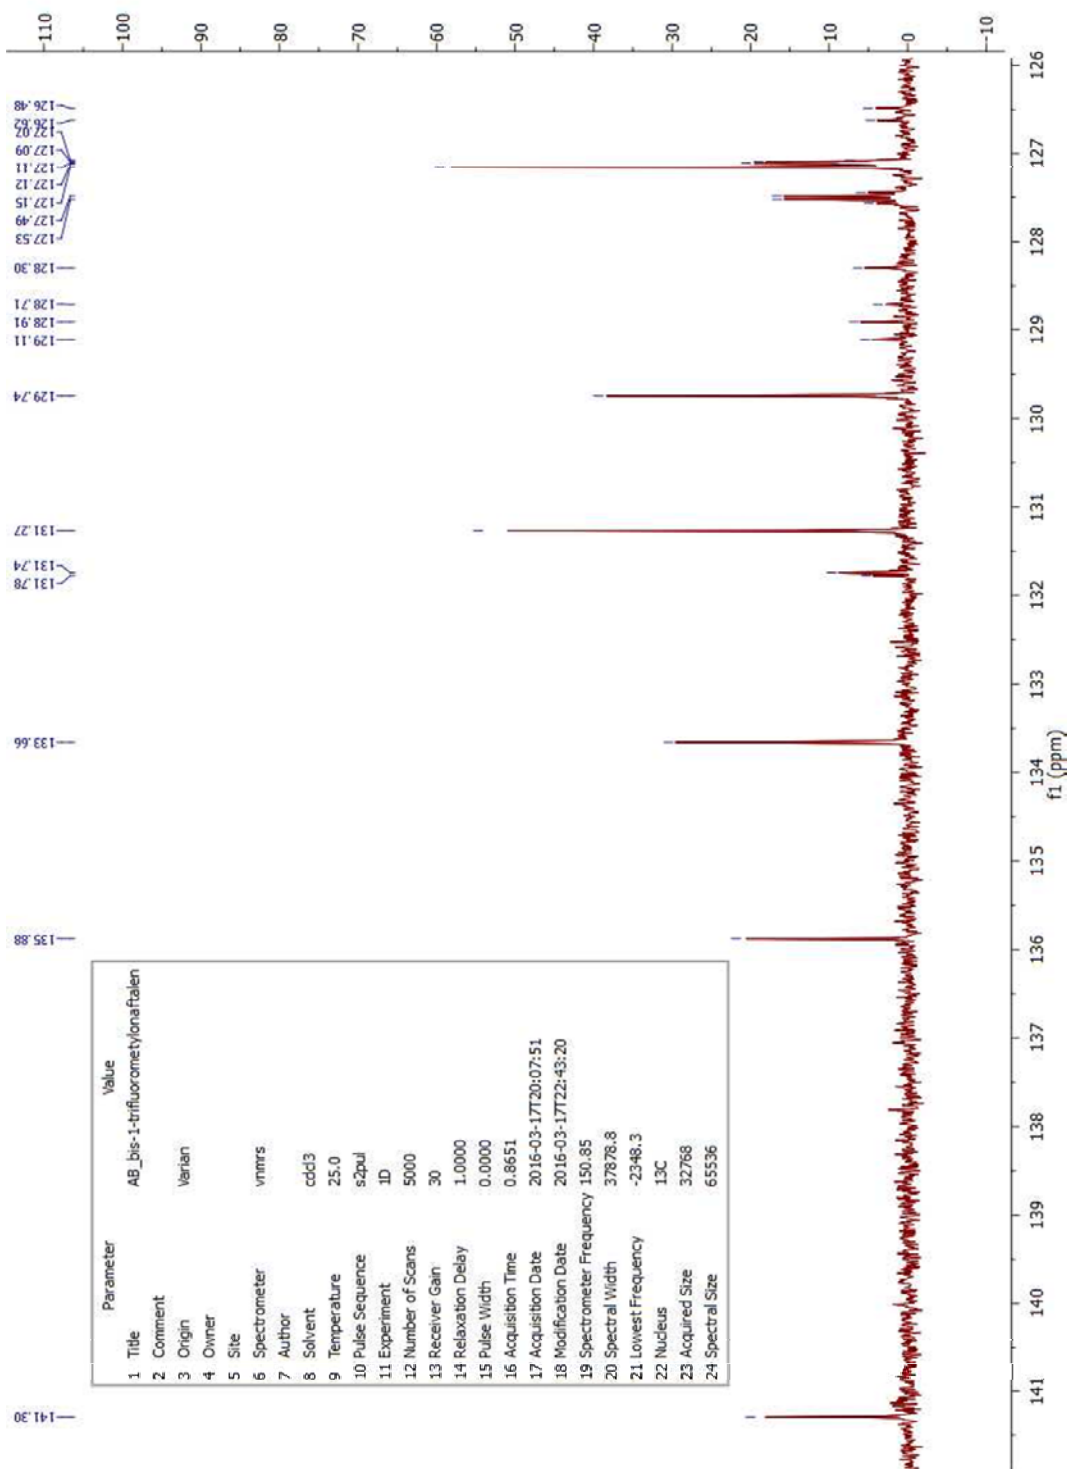

# 5,5'-bis(trifluoromethyl)-1,1'-binaphthyl HSQC

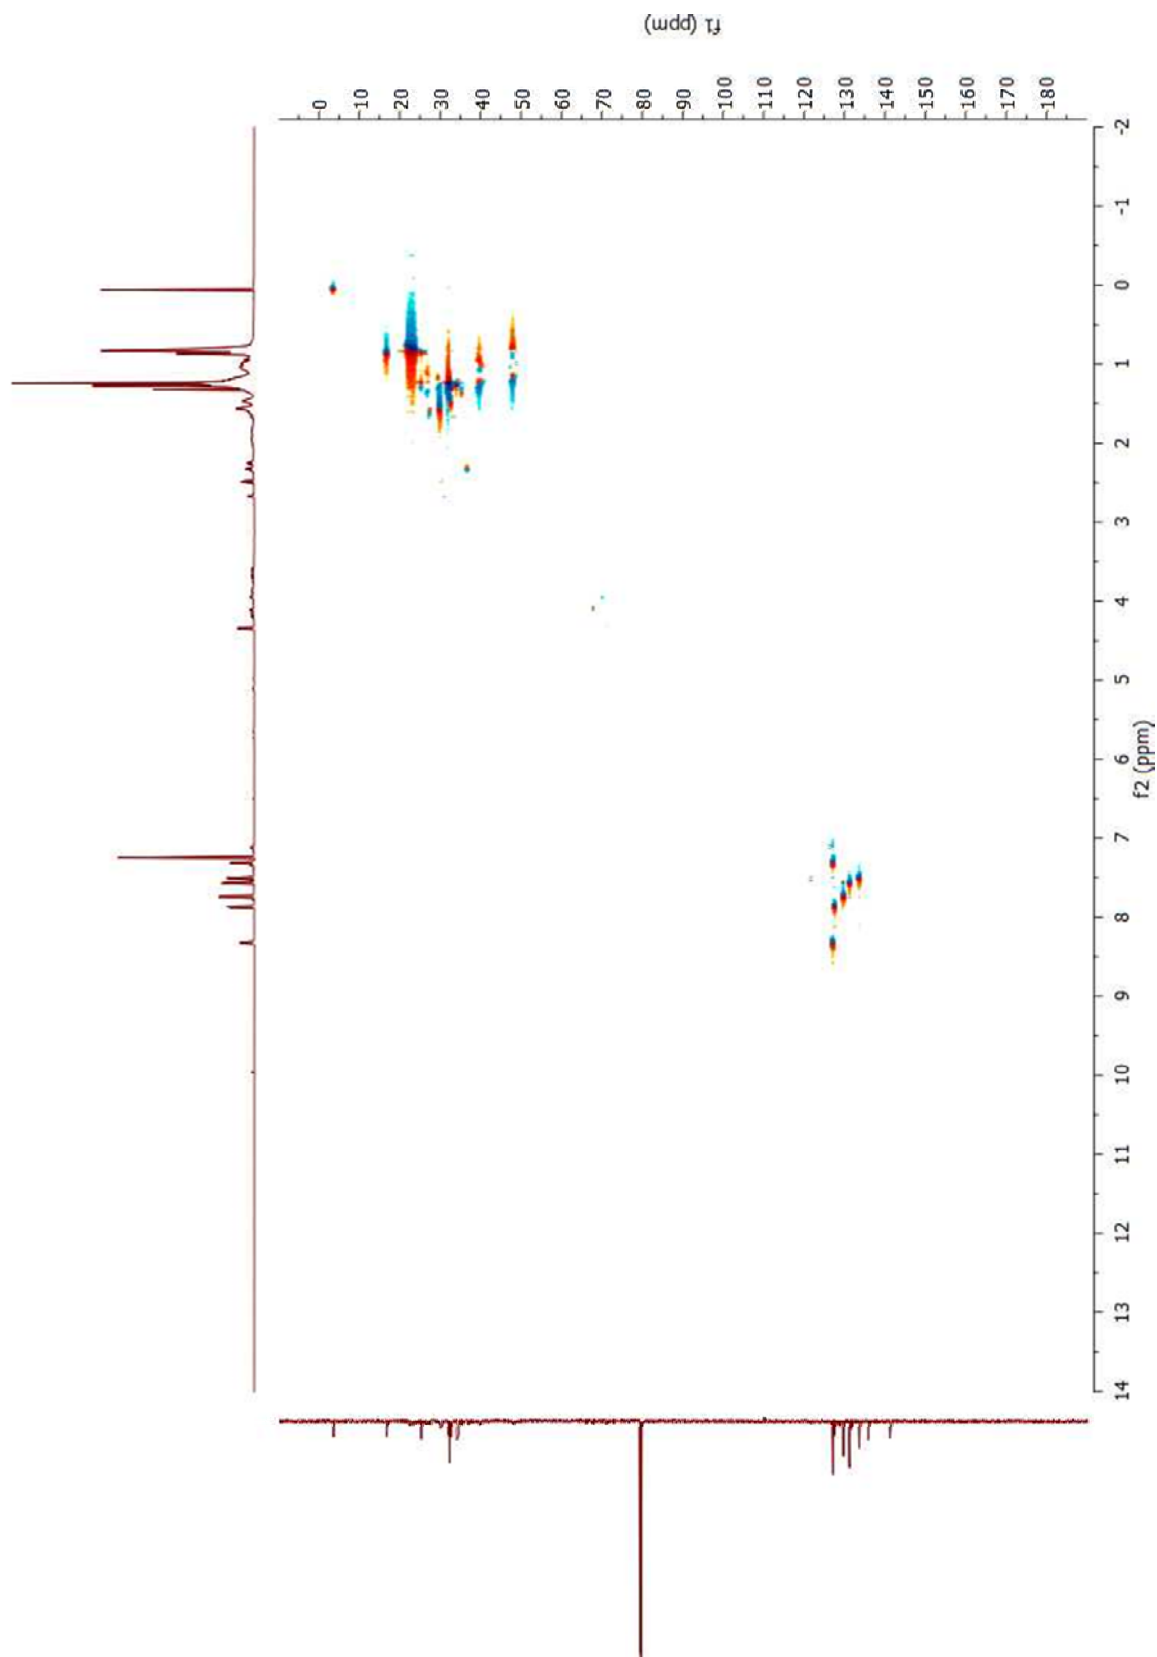



# 5,5'-bis(trifluoromethyl)-1,1'-binaphthyl HMBC

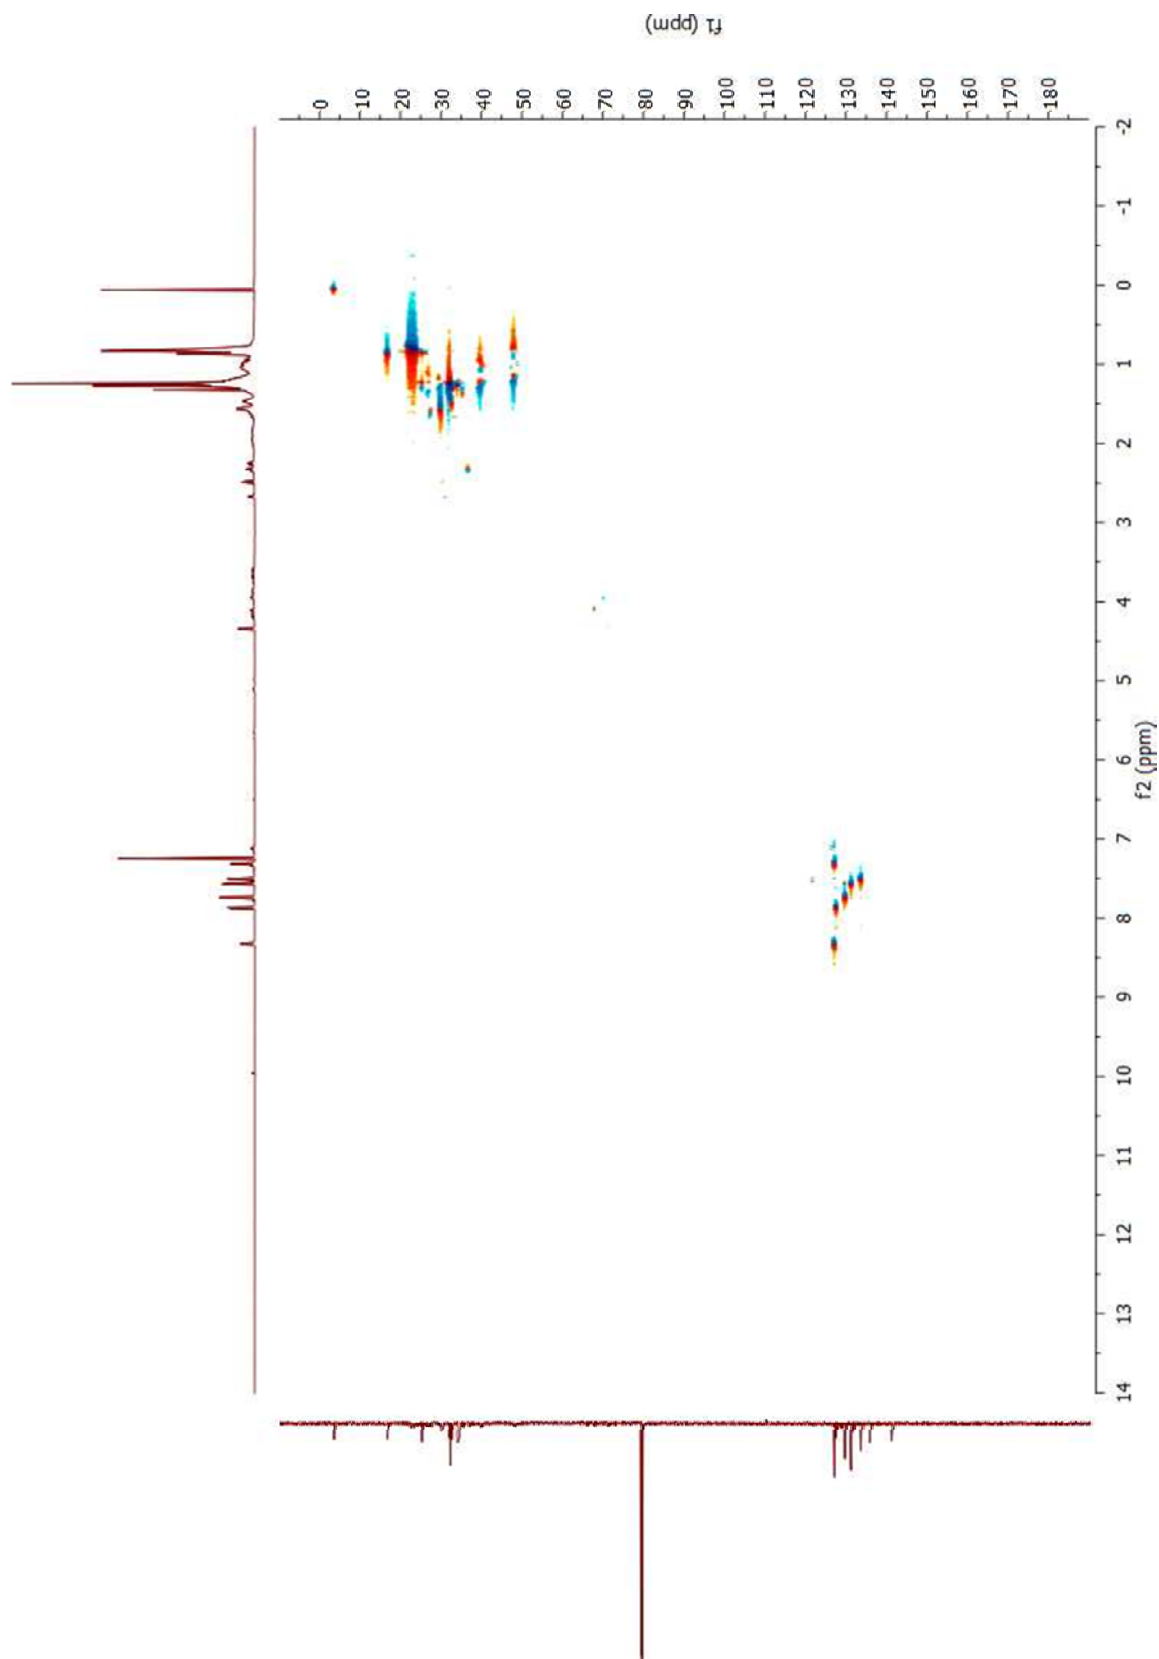

# 5,5'-bis(trifluoromethyl)-1,1'-binaphthyl $^{19}\text{F}$ NMR

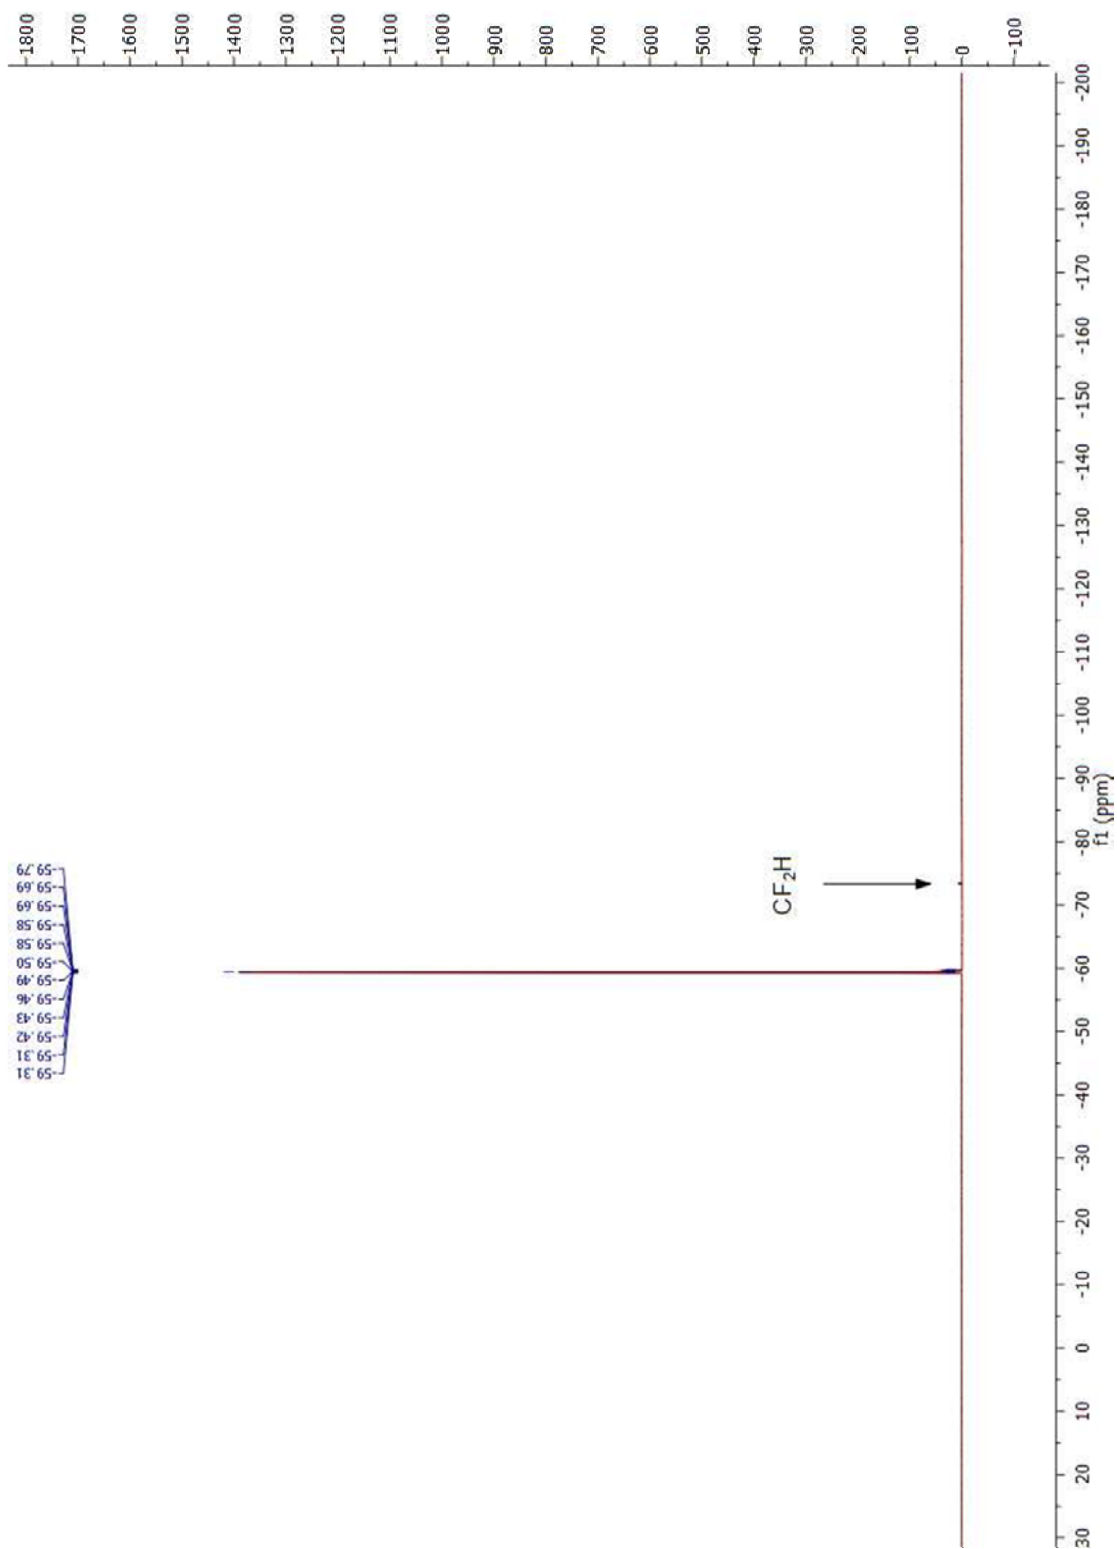

Supplement: c7nj02299a1.pdf [file c7nj02299a1.pdf]
